# Supplementary material
Source: Research Square preprint supplement (doi:10.21203/rs.3.rs-8473968/v1)
Supplement: Supplementary file 1 [file dbc08e7122f117e6a030d68c.docx]

**IN-DEPTH INTERVIEW GUIDE**

**QUESTIONS**

Dear Participant,

I am OgundareBolawaleMarvellous, an undergraduate student in the Department of Public Health, Faculty of Basic Medical Sciences, Osun State University. I am conducting a study to investigate the “**BARRIERS TO REPRODUCTIVE AUTONOMY; UNDERSTANDING FAMILY PLANNING ACCESS AND CHOICE AMONG WOMEN OF REPRODUCTIVE AGE IN OSUN STATE**”. Your sincere responses to these questions will be helpful in finding out factors that influence reproductive autonomy, and recommendations that can help in understanding family planning access and choice among women. The interview will be tape-recorded so that all information will be captured and properly documented. The information you give will be handled with respect for privacy and confidentiality, and can never be traced to you as it will only be used for research purposes. Your sincere responses to these questions will be highly appreciated. I implore you to relax and feel free to express your opinions. Thank you.

Signature …………………………………

***Do I have your permission to turn on the recorder?***

**SOCIO-DEMOGRAPHIC CHARACTERISTICS OF RESPONDENTS**

1. Have you heard about reproductive autonomy and family planning? If yes, can you tell me more about it? (*Probe for definition, types, methods, benefit, perceived severity etc.*)

2. Have you ever considered going for family planning? (*If yes, state what prompted you, if no, state why?)*

3. Do you feel like there is an unmet need for family planning and reproductive autonomy in your community? (*If yes, explain why you think so, if no, state why?*)

4. Have your partner/significant other (friends, mother, siblings, pastor, mother/father-in-law, community leader etc.) ever stopped you from using a contraceptive method to prevent pregnancy when you wanted to use one? (*If yes, state how he/your significant other stopped you, what reasons did he/they give?*)

5. Have your partner/significant others (friends, mother, siblings, pastor, mother/father-in-law, community leader etc.) ever pressured you to get pregnant? (*If yes, state how he, what reasons did he/they give?*)

6. Is your partner/significant others (friends, mother, siblings, pastor, mother/father-in-law, community leader etc.) supportive of your reproductive choices? (*Probe for sexual activity, pregnancy prevention, etc.*)

7. Whose decision is mostly prioritized when it comes to your reproductive health? *(Probe for who has the say in- pregnancy prevention, method used in pregnancy prevention, have a baby, what to do regarding an unplanned pregnancy, etc.)*

8. What are the local beliefs or customs that influence women’s use of family planning? (*Probe for perceptions of specific methods, safety and effectiveness)*

9. Can you tell me about the demand for family planning that you observe in your community? (*Probe for the specific things observed)*

10. Do you believe both gender should have a say about their reproductive life? (*If yes, what are the things that make you believe so, if no, give reasons)*

11. How do you think reproductive autonomy can be enabled among women? (*Probe for health education, increased access, availability, affordability, etc.)*

12. Any suggestions to improving women’s reproductive autonomy?

**FOCUS GROUP DISCUSSION GUIDE**

**QUESTIONS**

Dear Participant,

I am OgundareBolawaleMarvellous, an undergraduate student in the Department of Public Health, Faculty of Basic Medical Sciences, Osun State University. I am conducting a study to investigate the “**BARRIERS TO REPRODUCTIVE AUTONOMY; UNDERSTANDING FAMILY PLANNING ACCESS AND CHOICE AMONG WOMEN OF REPRODUCTIVE AGE IN OSUN STATE**”. Your sincere responses to these questions will be helpful in finding out factors that influence reproductive autonomy, and recommendations that can help in understanding family planning access and choice among women. The interview will be tape-recorded so that all information will be captured and properly documented. The information you give will be handled with respect for privacy and confidentiality, and can never be traced to you as it will only be used for research purposes. Your sincere responses to these questions will be highly appreciated. I implore you to relax and feel free to express your opinions. Thank you.

Signature …………………………………

***Do I have your permission to turn on the recorder?***

**SOCIO-DEMOGRAPHIC CHARACTERISTICS OF RESPONDENTS**

1. Has anyone ever heard about reproductive autonomy and family planning? If yes, can you tell me more about it? (*Probe for definition, types, methods, benefit, perceived severity etc.*)

2. Has anyone ever considered going for family planning? (*If yes, state what prompted you, if no, state why?)*

3. Do you feel like there is an unmet need for family planning and reproductive autonomy in your community? (*If yes, explain why you think so, if no, state why?*)

4. Has anyone’s partner/significant other (friends, mother, siblings, pastor, mother/father-in-law, community leader etc.) ever stopped you from using a contraceptive method to prevent pregnancy when you wanted to use one? (*If yes, state how he/your significant other stopped you, what reasons did he/they give?*)

5. Have your partner/significant others (friends, mother, siblings, pastor, mother/father-in-law, community leader etc.) ever pressured you to get pregnant? (*If yes, state how he, what reasons did he/they give?*)

6. Is your partner/significant others (friends, mother, siblings, pastor, mother/father-in-law, community leader etc.) supportive of your reproductive choices? (*Probe for sexual activity, pregnancy prevention, etc.*)

7. Whose decision is mostly prioritized when it comes to your reproductive health? *(Probe for who has the say in- pregnancy prevention, method used in pregnancy prevention, have a baby, what to do regarding an unplanned pregnancy, etc.)*

8. What are the local beliefs or customs that influence women’s use of family planning? (*Probe for perceptions of specific methods, safety and effectiveness)*

9. Can you tell me about the demand for family planning that you observe in your community? (*Probe for the specific things observed)*

10. Do you believe both gender should have a say about their reproductive life? (*If yes, what are the things that make you believe so, if no, give reasons)*

11. How do you think reproductive autonomy can be enabled among women? (*Probe for health education, increased access, availability, affordability, etc.)*

12. Any suggestions to improving women’s reproductive autonomy?
